# Supplementary figures and images for: Ghrelin and adipokines as circulating markers of disease activity in patients with Takayasu arteritis
Source: Springer Nature journal article supplement (doi:10.1186/ar4120), 2012-12-21

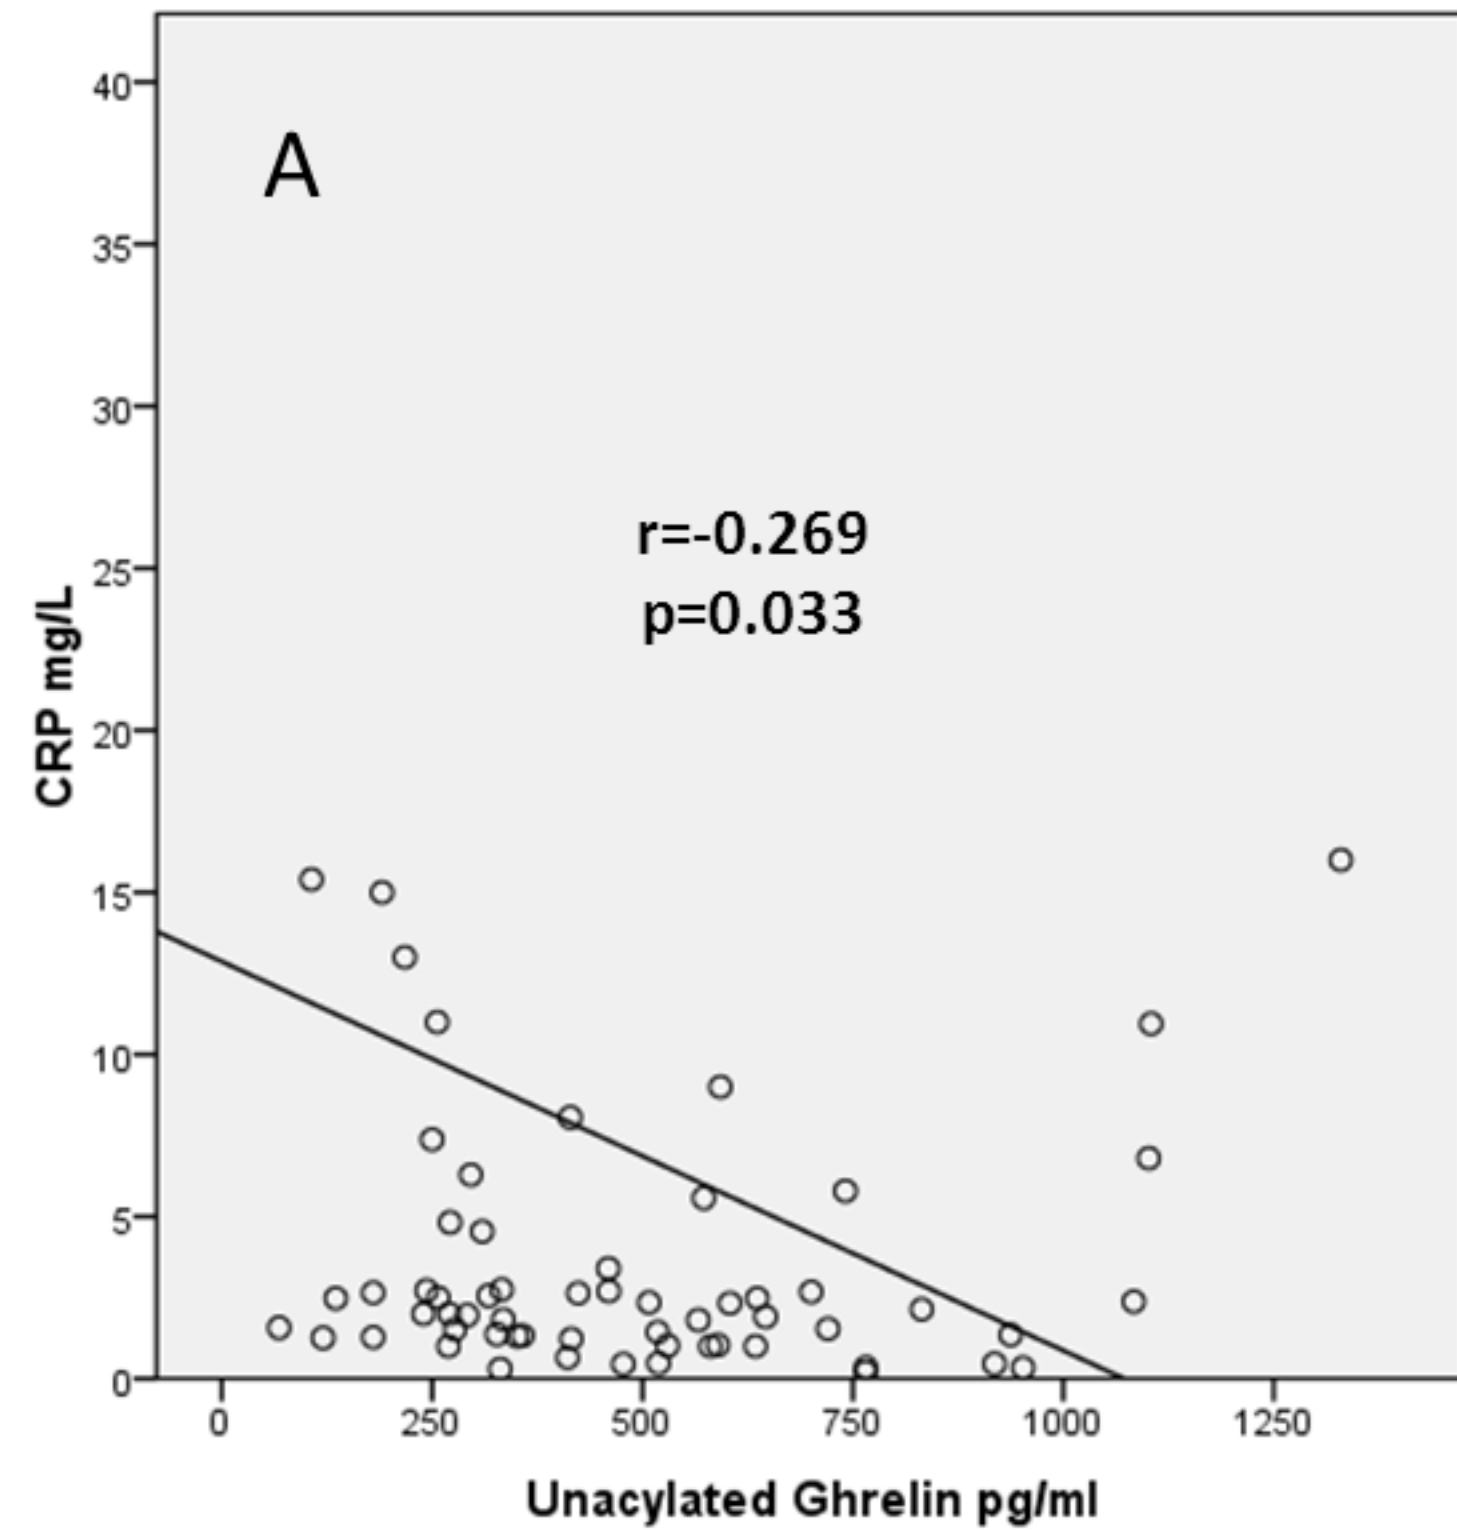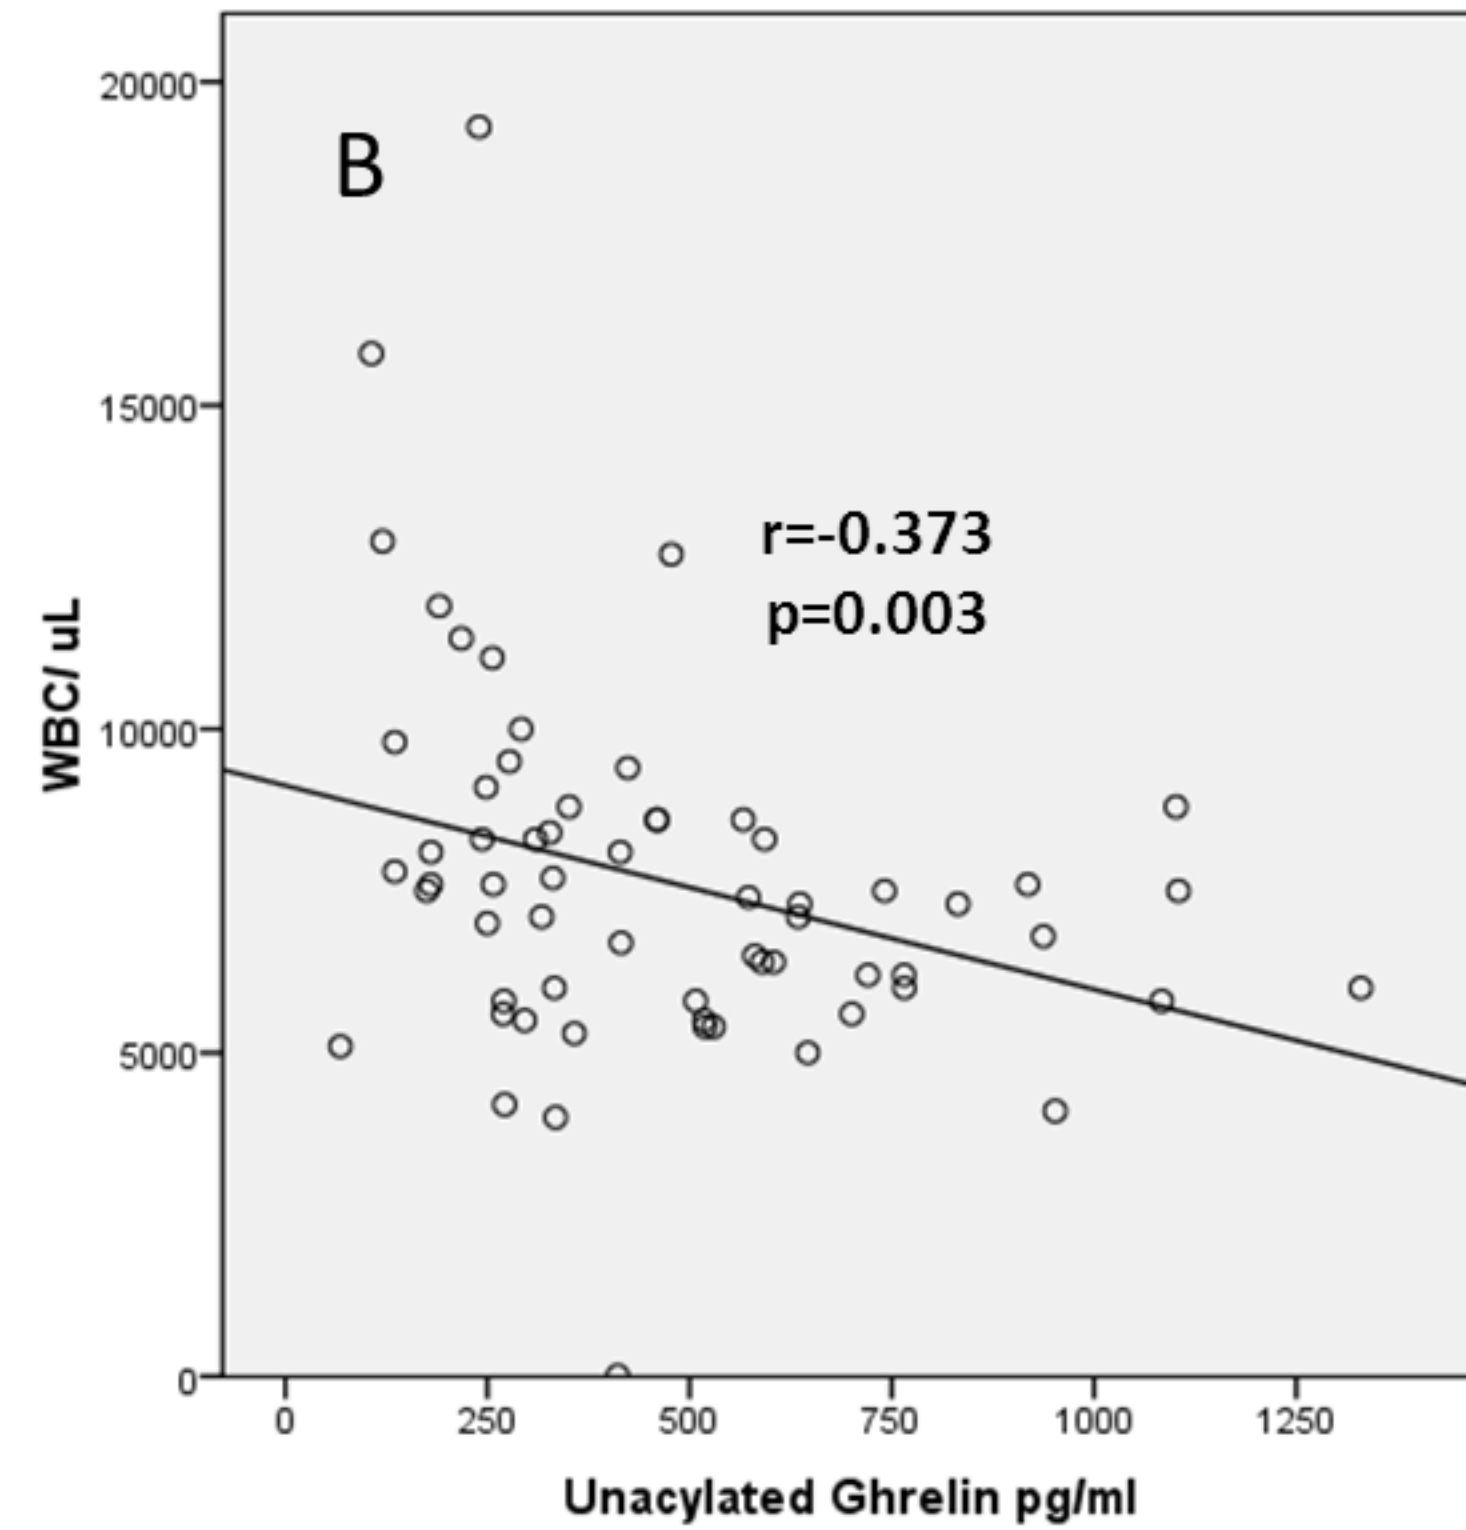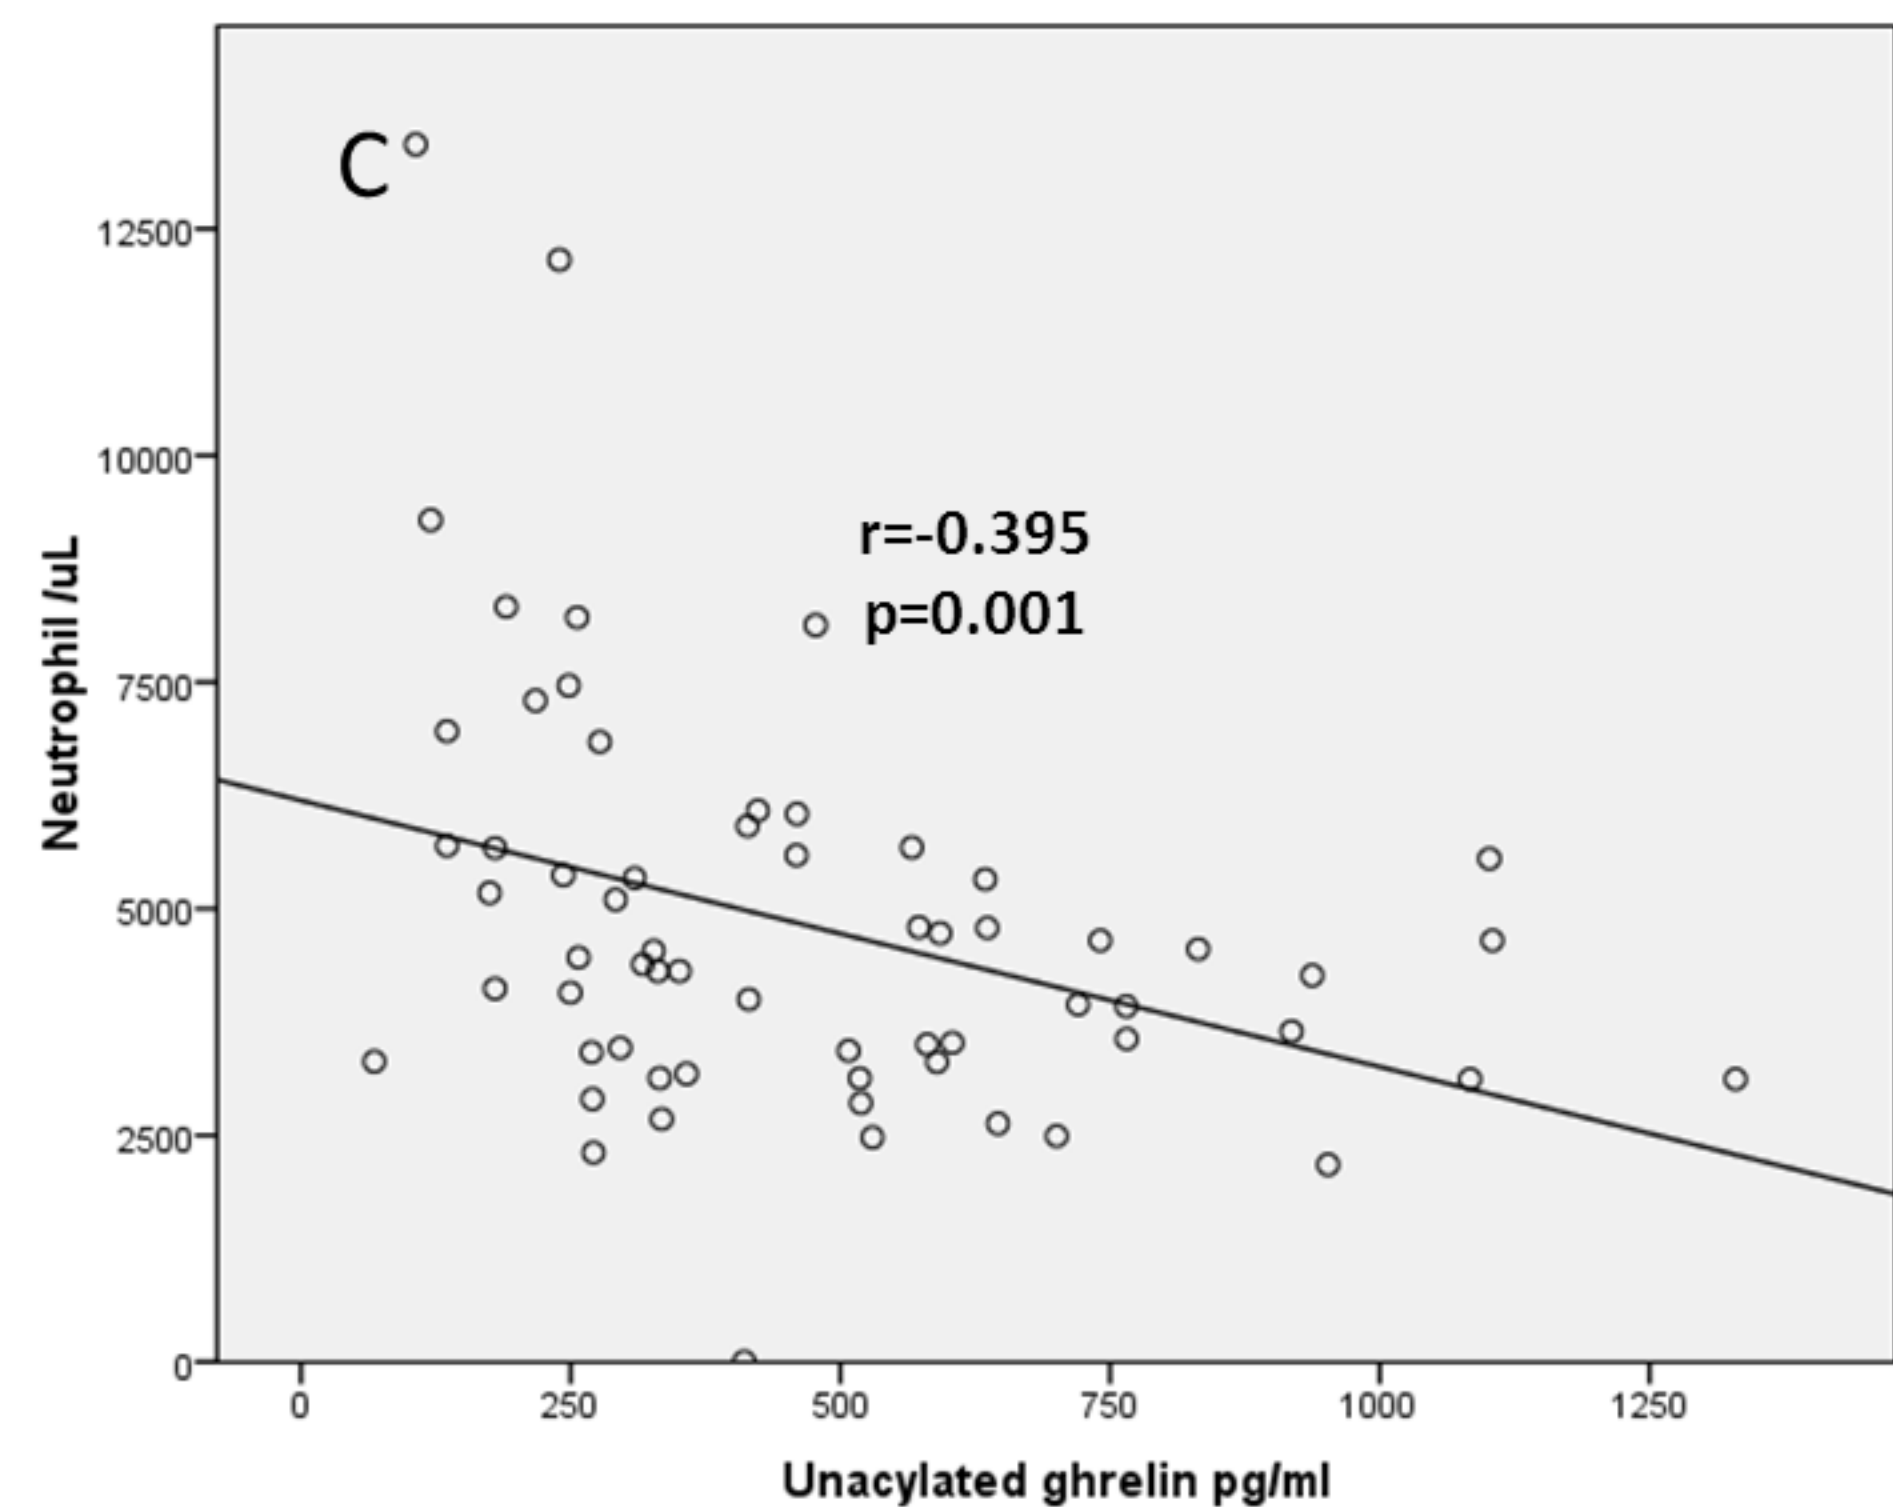

Supplement: 13075_2012_3873_MOESM2_ESM.pdf [file 13075_2012_3873_MOESM2_ESM.pdf]
